1 High content analysis of granuloma histology and neutrophilic inflammation in adult zebrafish  
2 infected with *Mycobacterium marinum*

3

4 Tina Cheng<sup>1</sup>, Julia Y Kam<sup>1</sup>, Matt D Johansen<sup>1</sup>, Stefan H Oehlers<sup>1,2</sup>

5

6 <sup>1</sup> Tuberculosis Research Program at the Centenary Institute, The University of Sydney,  
7 Camperdown, NSW 2050, Australia

8 <sup>2</sup> The University of Sydney, Discipline of Infectious Diseases & Immunology and Marie Bashir  
9 Institute, Camperdown, NSW 2050, Australia

10 Corresponding author [stefan.oehlers@sydney.edu.au](mailto:stefan.oehlers@sydney.edu.au)

11

12 Funding:

13 This work was supported by an Australian National Health and Medical Research Council CJ  
14 Martin Early Career Fellowship APP1053407 and Project Grant APP1099912; The University of  
15 Sydney Fellowship G197581; NSW Ministry of Health under the NSW Health Early-Mid Career  
16 Fellowships Scheme H18/31086; and the Kenyon Family Foundation Inflammation Award  
17 (S.H.O.).

18

19 Abstract

20 Infection of zebrafish with natural pathogen *Mycobacterium marinum* is a useful surrogate for  
21 studying the human granulomatous inflammatory response to infection by *Mycobacterium*  
22 *tuberculosis*. The adaptive immune system of the adult stage zebrafish offers an advance on the  
23 commonly used embryo infection model as adult zebrafish form granulomas with striking  
24 similarities to human-*M. tuberculosis* granulomas. Here, we present workflows to perform high  
25 content analyses of granulomas in adult zebrafish infected with *M. marinum* by cryosectioning to  
26 take advantage of strong endogenous transgenic fluorescence adapted from common zebrafish

27 embryo infection tools. Specific guides to classifying granuloma necrosis and organisation,  
28 quantifying bacterial burden and leukocyte infiltration of granulomas, and visualizing extracellular  
29 matrix remodelling and foam cell formation are also provided. We use these methods to  
30 characterize neutrophil recruitment to *M. marinum* granulomas across time and find an inverse  
31 relation to granuloma necrosis suggesting granuloma necrosis is not a marker of immunopathology  
32 in the natural infection system of the adult zebrafish-*M. marinum* pairing. The methods can be  
33 easily translated to studying the zebrafish adaptive immune response to other chronic and  
34 granuloma-forming pathogens.

35

36 Keywords

37 Zebrafish, mycobacterial infection, immunity, cryosection, fluorescence microscopy, ImageJ

38

39 1. Introduction

40 Granulomas are the structural hallmark of human tuberculosis caused by infection with  
41 *Mycobacterium tuberculosis*. Tuberculous granulomas are comprised of host immune cells from the  
42 innate and adaptive lineages that act in concert to physically contain mycobacteria. Recent research  
43 has provided evidence that pathogenic mycobacteria actively drive granuloma formation, and  
44 associated inflammation, in a strategy to evade immune control (Ramakrishnan, 2012).

45

46 The zebrafish-*Mycobacterium marinum* infection system is an important model of human  
47 tuberculosis. Transparent zebrafish embryos have been extensively utilized to understand the early  
48 pathogenesis of mycobacterial infection and specifically the host-microbe interactions mediated by  
49 innate immune cells. The innate immune cell granulomas in zebrafish embryos recapitulate several  
50 important aspects of human-*M. tuberculosis* granulomas including macrophage epithelioid  
51 differentiation, necrosis, and the dynamic recruitment of susceptible naïve macrophages and egress  
52 of infected macrophages (Davis et al., 2002; Davis and Ramakrishnan, 2009). However, zebrafish

53 embryos lack an adaptive immune system and generally lose control of infection within 5-7 days  
54 precluding any investigation of sterilizing or latent granulomas.

55

56 Infection of adult zebrafish with *M. marinum* provides the addition of the adaptive immune system  
57 to the zebrafish-*M. marinum* platform. Adult zebrafish form granulomas that are structurally closer  
58 to the human-*Mycobacterium tuberculosis* granuloma than that seen in inbred mouse-*M.*  
59 *tuberculosis* granulomas, and recapitulate important aspects of human granulomas such as hypoxia,  
60 sterilizing immunity and latency (Oehlers et al., 2015; Parikka et al., 2012). Histological  
61 examination of the adult zebrafish-*M. marinum* infection system has been instrumental in advancing  
62 our understanding of mycobacterial virulence, granuloma macrophage epithelioid differentiation,  
63 vascularization, and the adaptive immune response to mycobacterial infection (Cronan et al., 2016;  
64 Oehlers et al., 2015; Parikka et al., 2012; Prouty et al., 2003; Risalde et al., 2018; Swaim et al.,  
65 2006; van der Sar et al., 2004; Volkman et al., 2004; Weerdenburg et al., 2012).

66

67 Here, we present our simple methodology for generating specimens and analysis of granulomas  
68 from cryosection-generated slides. We almost exclusively utilize frozen rather than paraffin  
69 sectioning to take advantage of the strong native fluorescence afforded by *msp12* promoter-driven  
70 fluorescence in *M. marinum* (pTEC plasmids available  
71 [https://www.addgene.org/Lalita\\_Ramakrishnan/](https://www.addgene.org/Lalita_Ramakrishnan/)) and the wide range of immune cell lineage  
72 transgenic markers available in zebrafish (see Table 1) (Takaki et al., 2012; Takaki et al., 2013).

73

## 74 2. Critical Experimental Materials

75 Water for fish: 1 g/L sea salt water or aquarium system water.

76 Dry fish food: we use O.range GROW (INVE Aquaculture). Similar results are expected with any  
77 solid pellet or flake shaped food where it is simple to remove uneaten debris. We have avoided the  
78 use of live feeds due to difficulty in cleaning uneaten feed from beakers.

79 Fluorescent *M. marinum*: We utilize an abbreviated version of the method described by Takaki *et*  
80 *al.*, bacteria are grown in 7H9 liquid media supplemented with OADC (Sigma-Aldrich M0678),  
81 Tween-80 (Sigma-Aldrich P6474, final concentration 0.0045%) and 50 g/l hygromycin to a mid log  
82 phase (OD<sub>600</sub> ~0.6-0.8). Bacteria are harvested by repeated centrifugation, passage through 29 G  
83 needles, and resuspension in 7H9 supplemented with OADC only to prepare a single cell  
84 suspension. This single cell suspension is then frozen at -80°C and diluted as necessary for infection  
85 experiments (Takaki *et al.*, 2013).

86 PBS: Phosphate buffered saline.

87 Phenol red dye: 0.5% in Dulbecco's Phosphate Buffered Saline, sterile-filtered (Sigma-Aldrich  
88 P0290).

89 Parafilm.

90 Tricaine: 15x tricaine stock is 4 g/l MS-222 (Ethyl 3-aminobenzoate methanesulfonate, Sigma-  
91 Aldrich E10521) dissolved in deionized water and pH adjusted to 7 with sodium hydroxide.

92 Injection needles: 31 G BD Ultra-Fine II Short Needle 0.3 ml syringe. Provides similar results to  
93 Hamilton Syringes with the ease of disposable price.

94 Bleach: final concentration of decontaminating solution should be 1% available bleach. Generally  
95 this is achieved with a 10% volume of commercially available 10% bleach poured into a carboy  
96 prior to addition of contaminated liquids.

97 Fixative: 10% neutral buffered formalin or 16% paraformaldehyde for dilution into media at a 1:3  
98 ratio for a final concentration of 4% paraformaldehyde.

99 30% (w/v) sucrose: 30 g sucrose / 100 ml deionized water, filter sterilized.

100 OCT: Optimal Cutting Temperature (OCT) compound. We currently use Sakura #4583 but have  
101 used a variety of commercial suppliers and have not observed appreciable differences.

102 High quality adhesion microscope slides: We currently use SuperFrost Ultra Plus© Thermo  
103 Scientific. Lower grades of slides have been more prone to tissue loss.

104 Blocking solution: The majority of our secondary antibodies were raised in goat so we routinely use  
105 normal goat serum diluted to 5% in PBS.

106 Primary antibody to boost GFP signal: Chicken Anti-GFP (Abcam: ab13970)

107 Secondary antibody to boost GFP signal: Goat anti-Chicken IgY (H+L), Alexa Fluor® 488  
108 (Abcam: ab150169)

109 Fluoromount with DAPI: We currently use DAPI Fluoromount (Proscitech IM035) but have  
110 achieved similar results with anti-fade mounting media with DAPI from a range of suppliers.

111 FIJI-modified ImageJ: Free download at <https://fiji.sc/> allows simple opening of proprietary  
112 microscope image formats and enhanced functionality on top of ImageJ (Schindelin et al., 2012;  
113 Schneider et al., 2012).

114

### 115 3. Infection procedure

116 1. Collect zebrafish from your aquarium system into clean water for fish within 1000 ml  
117 beakers covered by tin foil. We typically house 5-6 zebrafish in 500 ml liquid volume within  
118 a 1000 ml beaker. Change ~25% water daily to remove fecal matter and feed with dry fish  
119 food.

120 2. Acclimatize zebrafish to new housing for period determined by your animal welfare code.  
121 Beakers should be kept in 28°C environment with light cycle matching your aquarium.

122 3. Set up injection station with equipment illustrated in Figure 1.

123 4. Thaw aliquots of *M. marinum* and dilute in sterile PBS and phenol red dye to produce a  
124 ~200CFU concentration of bacteria per 10 or 15 µl. Typically we perform the final dilution  
125 into 450 µl PBS and 50 µl phenol red dye.

126 5. Spot 10-15 µl of inoculum onto parafilm so that there is one spot per zebrafish plus a  
127 “spare” spot to be ready to compensate for mistakes. We generally inject 15 µl into cohorts  
128 of animals larger than 30 mm Standard Length.

- 129 6. Anesthetize zebrafish in 0.6-0.75x tricaine in groups of up to 5-6 depending on user speed.  
130 We typically start training users by anesthetizing 2 zebrafish at a time.
- 131 7. Draw up bacterial inoculum into injection needle with bevel down while zebrafish lose  
132 consciousness.
- 133 8. Transfer a single zebrafish onto wetted sponge and position with ventral side towards your  
134 dominant hand.
- 135 9. Use a finger on your non-dominant hand to secure the zebrafish against the wetted sponge  
136 and inject into the anaesthetized adult fish under the “armpit” of the pelvic fin into the  
137 intraperitoneal space holding the injection needle and syringe in your dominant hand.  
138 Correctly injected fish will have red dye visible within the peritoneal cavity. Common  
139 incorrect injections can result in significant dye leakage out (incorrect angle of injection) or  
140 subdermal spread of dye (insufficient penetration through the skin).
- 141 10. Recover injected fish back into clean water for fish at 28°C and monitor for recovery from  
142 anesthetic. Animals typically recover within 2-5 minutes from the low dose of anesthetic  
143 used in this procedure.
- 144 11. House infected zebrafish in a dedicated 28°C incubator fitted with a light cycle matching  
145 your aquarium. A simple household power outlet timer and an LED lamp fixed to a standard  
146 air jacket incubator is a cost-effective solution to maintain containment of BSL2 *M.*  
147 *marinum*-infected zebrafish.
- 148 12. Monitor infected fish daily. We typically house 5-6 zebrafish in 500 ml liquid volume  
149 within a 1000 ml beaker. Fecal matter and 200-250 ml water are removed by pipetting with  
150 a 50 ml pipette and decontaminated in bleach. Water is replaced and animals are fed  
151 standard dry fish food. Take care to only feed as much food as is rapidly consumed, the  
152 small water volumes are highly susceptible to spoiling by rotting food. Zebrafish will  
153 typically lose their appetite in the first 2-3 days post infection.

154 13. Euthanize zebrafish from 2 weeks post infection to observe stereotypical granulomas. We  
155 utilize tricaine overdose although comparable results are expected for other methods of  
156 euthanasia such as ice water bath.

157

#### 158 4. Preparation for cryosectioning

159 1. Transfer euthanized zebrafish to Petri dish.

160 2. Use two tweezers to guillotine the tail off at a point caudal to the cloaca. This will aid fitting  
161 the zebrafish into a cryomold.

162 3. Use tweezers perform an incision into the side of the peritoneal cavity skin taking care not  
163 to disrupt the internal organs.

164 4. Optional: decapitate zebrafish using two tweezers to guillotine the head off at the gills.  
165 Although observed by other groups using the *M. marinum* E11 strain, we have never  
166 observed *M. marinum* M strain dissemination to the head following intraperitoneal injection  
167 (van Leeuwen et al., 2014). Decapitation may also aid fitting particularly large zebrafish  
168 into a cryomold.

169 5. Fix in fixative for 1-3 days at 4 °C. Longer periods may diminish endogenous fluorescence.

170 6. Wash fixed specimens in PBS for at least 1 hour at room temperature.

171 7. Optional: decalcify in 0.5M EDTA. This step is not necessary in our hands as microtome  
172 blades easily cut through bone and scales.

173 8. Replace PBS with 30% (w/v) sucrose solution overnight at room temperature.

174 9. Remove 50% volume of sucrose and replace with OCT compound for a 50:50 final ratio and  
175 incubate overnight at room temperature.

176 10. Replace mixture with OCT compound and incubate overnight at room temperature.

177 11. Transfer specimens to cyromolds and cover with OCT compound.

178 12. Freeze embedded specimens in -80 °C freezer for at least 1 hour.

179

## 180 5. Cryosectioning, fluorescence staining and imaging

- 181 1. Prewarm specimens and cool microtome blade to -20 °C in cryostat.
- 182 2. Mount specimen, trim as necessary, and align parallel to microtome blade.
- 183 3. Section at 20 µm and mount onto high quality adhesion microscope slides. We only collect  
184 sections once the peritoneal cavity is visible as we have not observed mycobacterial  
185 dissemination to the skin or muscle.
- 186 4. Optional: to save time and reduce redundancy between adjacent sections, we typically  
187 collect 3 sections onto an “A” slide, the next 3 sections onto a “B” slide and then discard the  
188 next 4 sections resulting in slides containing sections spaced 200 µm apart. We routinely  
189 collect 6-8 sections per standard microscope slide yielding approximately 10-20 slides per  
190 infected zebrafish.
- 191 5. Label slides and store in at -20°C in cryostat until sectioning is complete.
- 192 6. Optional: use a fluorescent dissecting microscope to check slides for fluorescent bacteria.  
193 Discard early and late slides that do not contain fluorescent bacteria. Do not overexpose  
194 slides at this point, fluorescence bleaches rapidly in OCT.
- 195 7. Store slides at -80°C until imaging.
- 196 8. Thaw slides for 2-5 minutes at room temperature.
- 197 9. Wash slides 1 or 2 times in PBS for 5 minutes to remove OCT. Rinsing is critical as residual  
198 OCT interferes with downstream fluorescence microscopy.
- 199 10. Optional antibody staining: determine if your fluorophores of interest require signal  
200 boosting with fluorescently labeled antibodies (Table: Zebrafish reporter lines and  
201 visualization strategies) or if you are combining native transgenic fluorescence with  
202 additional antibody detection targets (such as hypoxyprom, E-cadherin, L-plastin).
  - 203 a. Postfix slides in fixative for 1-2 minutes at room temperature. Although longer  
204 incubations will preserve sections during subsequent wash steps, postfixing diminishes  
205 native fluorescence.



- 206           b. Rinse slides twice in PBS for 5 minutes to remove fixative.
- 207           c. Block slides for 1 hours at RT with blocking solution of choice by gentle pipetting
- 208           onto the top of the slide. Cover with parafilm.
- 209           d. Flick off blocking solution and gently pipette 100-150  $\mu$ l diluted primary antibody
- 210           onto the slide. Cover with parafilm, add water to slide box to humidify, and incubate
- 211           at 4°C overnight.
- 212           e. Next day, rinse slides with 3-4 changes of PBS over 30 minutes to remove unbound
- 213           primary antibody.
- 214           f. Gently pipette 100-150  $\mu$ l diluted secondary fluorescent antibody onto the slide.
- 215           Cover with parafilm, add water to slide box to humidify, and incubate at 4°C
- 216           overnight or 3-4 hours at room temperature.
- 217           g. Rinse slides with 3-4 changes of PBS over 30 minutes to remove unbound secondary
- 218           antibody.

219           Notes: sections can be highly susceptible to damage during washing and antibody

220           addition steps. Take care to reduce sheer forces when moving slides and pipetting.

221           11. Apply 1-3 drops of fluoromount with DAPI and cover slide with coverslip.

222           12. Image on microscope of choice collecting each channel as a separate file or in a format that

223           allows splitting of channels in ImageJ. We utilize microscopes with a “stitch” or “mosaic”

224           feature which allows the assembly of a whole section frame of view from several individual

225           fields of view.

226

## 227   6. Fluorescence image analysis

228           1. Open file(s) in FIJI-modified ImageJ. If necessary, split image into individual channels

229           using the menu item Image>Color>Split Channels.

230           2. Adjust the brightness parameters of each channel to minimize background fluorescence and

231           maximize positive signal using the menu item Image>Adjust>Brightness/Contrast.

232 Optimizing the DAPI and bacterial fluorescence channels will assist in accurately  
233 determining the edges of granulomas in subsequent steps.

234 3. Merge at least your DAPI and bacterial fluorescence channels into a recolorized image using  
235 the menu item Image>Color>Merge Channels. Activate “Create composite” and “Keep  
236 source images”, ensure “Ignore source LUTs” is deactivated.

237 4. Use the “Freehand selections” tool to trace the edges of a granuloma (Figure 2A).  
238 Additional channels of immune cells may aid identification of granuloma edges, or  
239 potentially bias analysis.

240 5. Press the “t” button on your keyboard to add the selection to your region of interest (ROI)  
241 manager list.

242 6. Repeat steps 4 and 5 until all granulomas are assigned a ROI.

243 7. Optional: save the ROI list using the ROI Manager menu command More>Save. This is  
244 useful if you are going to perform image analyses across different sessions.

245 8. Optional: save the overlay image for reference.

246 9. Quantify bacterial burden.

247 a. Reopen the bacterial channel image or revert from the brightness-adjusted image  
248 using the menu item File>Revert.

249 b. Record a macro with the following instructions, macro code lines are *italicized* and  
250 available in the Supplementary data:

251 i. Convert file to 8-bit: Image>Type>8-bit= *run("8-bit");*

252 ii. Remove scale to produce results in pixels: Analyze>Set Scale>”Click to  
253 Remove Scale”, “OK” = *run("Set Scale...", "distance=0");*

254 iii. Set thresholding to highlight pixels above threshold =  
255 *setAutoThreshold("Default dark");*

256 iv. Set thresholding limits to lowest specific bacterial fluorescence intensity as  
257 “XX” and 255 as maximal signal: Image>Adjust>Threshold>”Set” =  
258 *setThreshold(XX, 255);*

259 v. Either manual mode  
260 Count pixels above threshold: Analyze>Analyze Particles>Check  
261 “Summarize” = *run("Analyze Particles...", "summarize");*

262 vi. Or automatic mode  
263 Repeat operation through ROI list=  
264 *roiCount = roiManager("count");*  
265 *for (i=0; i<roiCount; i++) {*  
266 *roiManager("select", i);*  
267 *run("Analyze Particles...", "summarize");*  
268 *roiManager("select", i+1);*  
269 *run("Analyze Particles...", "summarize");*  
270 *roiManager("select", i+2);*  
271 *run("Analyze Particles...", "summarize");*  
272 *roiManager("select", i+3);*

273 Command can be repeated by duplicating the repeating two lines and  
274 continuing the sequence i+1, i+2, i+3, i+4 to accommodate the size of your  
275 ROI list. The Supplementary data for this paper contains a macro to count up  
276 to 70 regions of interest.

277 vii. Run the macro.

278 viii. Copy the Summary window data to your spreadsheet software of choice. The  
279 “Total Area” column provides bacterial burden per user-defined granuloma.

280 10. Classify granuloma morphology from the DAPI channel (Cronan et al., 2016).

281 a. Cellular vs necrotic

- 282 i. Switch to the brightness-adjusted DAPI channel image.
- 283 ii. Check the “Show All” and “Labels” boxes in the ROI Manager window to
- 284 highlight all user-defined granulomas.
- 285 iii. Score each granuloma in sequence for the presence of central necrosis
- 286 (Figure 2B).
- 287 b. Epithelialized vs disorganized
- 288 i. Switch to the brightness-adjusted DAPI channel image.
- 289 ii. Check the “Show All” and “Labels” boxes in the ROI Manager window to
- 290 highlight all user-defined granulomas.
- 291 iii. Score each granuloma for directional organization of host nuclei at the rim of
- 292 the granuloma (Figure 2B).
- 293 11. Quantify interaction of reporter marked cells with granulomas.
- 294 a. Leukocyte infiltration as an example of discrete data.
- 295 i. Reopen the leukocyte channel image or revert from the brightness-adjusted
- 296 image using the menu item File>Revert. If necessary, reload the saved ROI
- 297 list.
- 298 ii. Open the macro created in Step 9b to quantify bacterial burden. Adjust the
- 299 lower limit of the threshold “XX” in Step 9b-iv to lowest specific leukocyte
- 300 fluorescence intensity that removes background signal.
- 301 iii. Run the macro.
- 302 iv. Copy the Summary window data to your spreadsheet software of choice. The
- 303 “Total Area” column provides leukocyte pixel units per user-defined
- 304 granuloma. Leukocyte pixel units can be used as an arbitrary measurement of
- 305 leukocyte number or converted to Leukocyte units by calibrating to the pixel
- 306 area of single discrete leukocytes (Ellett and Lieschke, 2012). We do not
- 307 believe the “Count” column in the Summary window provides an accurate

308 estimation of leukocyte numbers as leukocytes are relatively amorphous  
309 compared to round colonies.

310 b. Blood vessel proximity as an example of continuous data (Oehlers et al., 2015).

311 i. Create a new two channel overlay of the brightness-adjusted bacterial and  
312 blood vessel channels using the menu item Image>Color>Merge Channels.

313 Activate “Create composite” and “Keep source images”, ensure “Ignore  
314 source LUTs” is deactivated.

315 ii. If necessary, reload the saved ROI list. Check the “Show All” and “Labels”  
316 boxes in the ROI Manager window to highlight all user-defined granulomas.

317 iii. Remove scale to produce results in pixels: Analyze>Set Scale>”Click to  
318 Remove Scale”, “OK”

319 iv. Use the “Straight line tool” to draw the shortest distance between the edge of  
320 bacterial fluorescence and the nearest blood vessel.

321 v. Use the menu command Analyze>Measure to calculate the length of the  
322 user-drawn straight line (the “Length” column of the Results window).

323 vi. Repeat Steps iv. to v. in ROI list sequence until all granulomas are assigned a  
324 minimum distance from vasculature.

325 vii. Export data to spreadsheet of choice to correlate with other granuloma  
326 parameters. Convert pixel units to  $\mu\text{m}$  using appropriate conversion factor.

327

## 328 7. Non-fluorescence correlative staining and microscopy

329 This section takes advantage of the library of adjacent slides created by the A/B section spacing  
330 described in step 5.4 to correlate bacterial distribution characterized in step 6 with histological

331 stains that destroy native fluorescence or are not compatible with fluorescence microscopy. This

332 section continues from step 5.9.

- 333 1. Oil Red O staining for foam cells (protocol for isopropanol solvent is similar just substitute  
334 isopropanol of propylene glycol in steps c, d, e) (Johansen et al., 2018).
- 335 a. Postfix slides in fixative for 5-10 minutes at room temperature.
  - 336 b. Filter 0.5% (w/v) Oil Red O (Sigma-Aldrich O0625) dissolved in propylene glycol  
337 to remove precipitate.
  - 338 c. Rinse slides twice in PBS for 5 minutes to remove fixative.
  - 339 d. Rinse slides twice in propylene glycol for 5 minutes.
  - 340 e. Stain slides in 0.5% (w/v) Oil Red O propylene glycol solution for 15 minutes.
  - 341 f. Rinse slides twice in propylene glycol for 5 minutes to remove background staining.
  - 342 g. Rinse slides briefly in PBS.
  - 343 h. Counterstain slides with a 1% (w/v) solution of methylene blue (Sigma-Aldrich  
344 M9140) dissolved in water or hematoxylin for 1 minute.
  - 345 i. Rinse slides briefly in tap water.
  - 346 j. Add 2-3 drops of with aqueous mounting media (Clear-Mount, Proscitech IM032)  
347 and mount coverslip.
  - 348 k. Image by light microscopy.
- 349 2. Picrosirius red staining for extracellular matrix remodeling.
- 350 a. Postfix slides in fixative for 5-10 minutes at room temperature.
  - 351 b. Rinse slides briefly twice in tap water to remove fixative.
  - 352 c. Cover slides in picrosirius red (Polysciences #24901 or 0.1% (w/v) Sirius red F3B  
353 dissolved in saturated picric acid) and incubate for 1 hour at room temperature.
  - 354 d. Rinse slides briefly twice in 0.1 N hydrochloric acid.
  - 355 e. Rinse slides in tap water.
  - 356 f. Dehydrate slides in 70% ethanol.
  - 357 g. Add 2-3 drops of ethanol-compatible mounting media (Entellan, Sigma-Aldrich  
358 107960) and mount coverslip.

359 h. Image by light or polarized light microscopy (Figure 3).

360

361 8. Characterization of neutrophil recruitment to granulomas.

362 We applied the methods described in Sections 3-6 on *Tg(lyzC:DsRed<sup>mz50</sup>)* zebrafish infected with *M.*  
363 *marinum*-wasabi to characterize neutrophil infiltration of granulomas across time, and as a function  
364 of bacterial burden and granuloma morphology (Figure 4A). Two to three animals were harvested at  
365 each of 1, 2, 4, and 6 weeks post infection and analyzed by our census technique generating 53, 81,  
366 24, and 125 granulomas at each timepoint respectively.

367

368 As expected from previous reports of zebrafish-*M. marinum* granuloma coalescence (Cronan et al.,  
369 2016; Cronan et al., 2018; Oehlers et al., 2015), bacterial burden per granuloma increased over time  
370 (Figure 4B). Our high content analysis further allowed us to stratify granulomas into non-necrotic  
371 (cellular) or necrotic categories. Total bacterial burden was evenly distributed across necrotic  
372 compared to non-necrotic granulomas at all timepoints with only a trend to a higher total of burden  
373 within necrotic granulomas seen at 2 wpi (P=0.16) illustrating the heterogeneity of granuloma  
374 classes in the zebrafish model (Figure 4C).

375

376 Analysis of neutrophil infiltration across time revealed fairly stable neutrophil recruitment per  
377 granuloma with a slight reduction at 2 wpi correlating with appearance of visible granuloma  
378 organization, neutrophil recruitment then trended toward gradually increasing later in infection at 4  
379 and 6 wpi (Figure 4D). The ratio of neutrophils to bacteria per granuloma peaked at 1 wpi followed  
380 by a significantly lower ratio across 2, 4 and 6 wpi, suggesting a more controlled inflammatory  
381 response following the initial spike at 1 wpi (Figure 4E). Stratification of granulomas by necrotic  
382 status revealed reduced neutrophil recruitment to necrotic granulomas at 2 wpi, but not the other  
383 timepoints (Figure 4F). This observation was accentuated by normalizing for bacterial burden in

384 each granuloma with significantly fewer neutrophils around necrotic granulomas for the first two  
385 weeks of infection (Figure 4G).

386

387 Interestingly, linear regression analysis found only a weak relationship between neutrophil  
388 infiltration and bacterial burden per granuloma at 1 wpi (R square 0.20, non-zero slope  $P=0.0007$ ),  
389 no relationship at 2 and 4 wpi, and a strong relationship at 6 wpi (R square 0.57, non-zero slope  
390  $P<0.0001$ ) suggesting an early burden-dependent influx of neutrophils that lessens during  
391 granuloma maturation and organization until later in infection when granulomas break down  
392 restarting the cycle (Figure 4H).

393

## 394 9. Conclusions

395 The methodologies presented here provide a blueprint to perform high content analyses of adult  
396 zebrafish-*M. marinum* granulomas. Our suggested census approach using correlative acquisition of  
397 quantitative data seeks to reproduce two important aspects of the zebrafish embryo-*M. marinum*  
398 infection model: *in toto* analysis of infection and high specimen numbers providing statistical  
399 power.

400

401 Advances in optical clearing of whole zebrafish for 3-dimensional *in situ* analysis of granulomas is  
402 a powerful tool for relatively artifact-free microscopy but requires access to expensive multiphoton  
403 microscopes to access deep tissues (Cronan et al., 2015). Our method attempts to census the  
404 granuloma load of individual zebrafish by creating a catalog of thin section snapshots at 200  $\mu\text{m}$   
405 intervals providing confidence that granulomas are not double counted. The use of explanted adult  
406 zebrafish-*M. marinum* granulomas is expected to provide insight into the 4-dimensional behavior of  
407 granulomas by serial live imaging and could be used to functionally investigate the correlative  
408 datasets produced by our methodology (Cronan et al., 2018).

409



410 Our analysis of bacterial burden in granuloma classes and neutrophil recruitment to granulomas  
411 over the course of intraperitoneal infection revealed two important findings. Firstly, the 2 wpi  
412 timepoint is distinct from earlier and later timepoints. Complementing our previous work  
413 demonstrating increased organization of granulomas at the 2 wpi timepoint (Cronan et al., 2016;  
414 Oehlers et al., 2015), we have documented both a trend to most bacteria being located within  
415 organized necrotic granulomas and a reduction in neutrophil infiltration to these necrotic  
416 granulomas at this timepoint. The initial peak in neutrophil recruitment to sites of *M. marinum* at 1  
417 wpi is a clear correlate with the initial inflammatory response seen in mammalian models of *M.*  
418 *tuberculosis* infection.

419

420 Secondly, our data suggest granuloma necrosis may be a natural step in the effective control of  
421 mycobacterial infection in the zebrafish model. Neutrophilic inflammation is a marker of  
422 granuloma-associated immunopathology in mammals and is usually associated with necrotic  
423 breakdown of granulomas (Barnes et al., 1988; Eruslanov et al., 2005; Eum et al., 2010).  
424 Conversely, our data shows reduced neutrophilic recruitment to necrotic granulomas compared to  
425 cellular lesions during early, presumably mostly primary, infection suggesting the formation of  
426 organized necrotic granulomas are the outcome of balancing immune control of infection without  
427 significant immunopathology in the adult zebrafish-*M. marinum* infection model. Previous work  
428 has shown granuloma macrophage epithelization excludes neutrophils from accessing granulomas  
429 in the zebrafish providing a mechanism for our observation (Cronan et al., 2016).

430

431 Zebrafish are susceptible to a range of chronic granuloma-forming infections by important human  
432 pathogens such as *Cryptococcus neoformans* and *Mycobacterium abscessus* (Bernut et al., 2014;  
433 Tenor et al., 2015). Our methodology can be easily translated to studying the zebrafish immune  
434 response to these pathogens with only minor changes to infectious dose in order to provide  
435 additional comparative models of host-pathogen interactions.

436

437 Acknowledgements

438 We thank Drs Mark Cronan and David Tobin at Duke University School of Medicine, and members  
439 of the Oehlers lab at the Centenary Institute for helpful discussion of techniques and  
440 troubleshooting.

441 This work was supported by an Australian National Health and Medical Research Council CJ  
442 Martin Early Career Fellowship APP1053407 and Project Grant APP1099912; The University of  
443 Sydney Fellowship G197581; NSW Ministry of Health under the NSW Health Early-Mid Career  
444 Fellowships Scheme H18/31086; and the Kenyon Family Foundation Inflammation Award  
445 (S.H.O.).

446

447 References

448 Ando, K., Fukuhara, S., Izumi, N., Nakajima, H., Fukui, H., Kelsh, R.N., Mochizuki, N., 2016.  
449 Clarification of mural cell coverage of vascular endothelial cells by live imaging of zebrafish.  
450 *Development* 143, 1328-1339.  
451 Barnes, P.F., Leedom, J.M., Chan, L.S., Wong, S.F., Shah, J., Vachon, L.A., Overturf, G.D., Modlin,  
452 R.L., 1988. Predictors of short-term prognosis in patients with pulmonary tuberculosis. *J*  
453 *Infect Dis* 158, 366-371.  
454 Bernut, A., Herrmann, J.L., Kissa, K., Dubremetz, J.F., Gaillard, J.L., Lutfalla, G., Kremer, L., 2014.  
455 *Mycobacterium abscessus* cording prevents phagocytosis and promotes abscess formation.  
456 *Proc Natl Acad Sci U S A* 111, E943-952.  
457 Cronan, M.R., Beerman, R.W., Rosenberg, A.F., Saelens, J.W., Johnson, M.G., Oehlers, S.H., Sisk,  
458 D.M., Jurcic Smith, K.L., Medvitz, N.A., Miller, S.E., Trinh, L.A., Fraser, S.E., Madden, J.F., Turner,  
459 J., Stout, J.E., Lee, S., Tobin, D.M., 2016. Macrophage Epithelial Reprogramming Underlies  
460 *Mycobacterial Granuloma* Formation and Promotes Infection. *Immunity* 45, 861-876.  
461 Cronan, M.R., Matty, M.A., Rosenberg, A.F., Blanc, L., Pyle, C.J., Espenschied, S.T., Rawls, J.F.,  
462 Dartois, V., Tobin, D.M., 2018. An explant technique for high-resolution imaging and  
463 manipulation of mycobacterial granulomas. *Nat Methods* 15, 1098-1107.  
464 Cronan, M.R., Rosenberg, A.F., Oehlers, S.H., Saelens, J.W., Sisk, D.M., Jurcic Smith, K.L., Lee, S.,  
465 Tobin, D.M., 2015. CLARITY and PACT-based imaging of adult zebrafish and mouse for whole-  
466 animal analysis of infections. *Dis Model Mech* 8, 1643-1650.  
467 Davis, J.M., Clay, H., Lewis, J.L., Ghori, N., Herbomel, P., Ramakrishnan, L., 2002. Real-time  
468 visualization of mycobacterium-macrophage interactions leading to initiation of granuloma  
469 formation in zebrafish embryos. *Immunity* 17, 693-702.  
470 Davis, J.M., Ramakrishnan, L., 2009. The role of the granuloma in expansion and dissemination  
471 of early tuberculous infection. *Cell* 136, 37-49.  
472 Ellett, F., Lieschke, G.J., 2012. Computational quantification of fluorescent leukocyte numbers  
473 in zebrafish embryos. *Methods Enzymol* 506, 425-435.

- 474 Eruslanov, E.B., Lyadova, I.V., Kondratieva, T.K., Majorov, K.B., Scheglov, I.V., Orlova, M.O., Apt,  
475 A.S., 2005. Neutrophil responses to *Mycobacterium tuberculosis* infection in genetically  
476 susceptible and resistant mice. *Infect Immun* 73, 1744-1753.
- 477 Eum, S.Y., Kong, J.H., Hong, M.S., Lee, Y.J., Kim, J.H., Hwang, S.H., Cho, S.N., Via, L.E., Barry, C.E.,  
478 3rd, 2010. Neutrophils are the predominant infected phagocytic cells in the airways of  
479 patients with active pulmonary TB. *Chest* 137, 122-128.
- 480 Hall, C., Flores, M.V., Storm, T., Crosier, K., Crosier, P., 2007. The zebrafish lysozyme C  
481 promoter drives myeloid-specific expression in transgenic fish. *BMC Dev Biol* 7, 42.
- 482 Hui, S.P., Sheng, D.Z., Sugimoto, K., Gonzalez-Rajal, A., Nakagawa, S., Hesselson, D., Kikuchi, K.,  
483 2017. Zebrafish Regulatory T Cells Mediate Organ-Specific Regenerative Programs. *Dev Cell*  
484 43, 659-672 e655.
- 485 Jin, S.W., Beis, D., Mitchell, T., Chen, J.N., Stainier, D.Y., 2005. Cellular and molecular analyses of  
486 vascular tube and lumen formation in zebrafish. *Development* 132, 5199-5209.
- 487 Johansen, M.D., Kasparian, J.A., Hortle, E., Britton, W.J., Purdie, A.C., Oehlers, S.H., 2018.  
488 *Mycobacterium marinum* infection drives foam cell differentiation in zebrafish infection  
489 models. *Dev Comp Immunol* 88, 169-172.
- 490 Lin, H.F., Traver, D., Zhu, H., Dooley, K., Paw, B.H., Zon, L.I., Handin, R.I., 2005. Analysis of  
491 thrombocyte development in CD41-GFP transgenic zebrafish. *Blood* 106, 3803-3810.
- 492 Marjoram, L., Alvers, A., Deerhake, M.E., Bagwell, J., Mankiewicz, J., Cocchiari, J.L., Beerman,  
493 R.W., Willer, J., Sumigray, K.D., Katsanis, N., Tobin, D.M., Rawls, J.F., Goll, M.G., Bagnat, M., 2015.  
494 Epigenetic control of intestinal barrier function and inflammation in zebrafish. *Proc Natl Acad*  
495 *Sci U S A* 112, 2770-2775.
- 496 Oehlers, S.H., Cronan, M.R., Scott, N.R., Thomas, M.I., Okuda, K.S., Walton, E.M., Beerman, R.W.,  
497 Crosier, P.S., Tobin, D.M., 2015. Interception of host angiogenic signalling limits mycobacterial  
498 growth. *Nature* 517, 612-615.
- 499 Parikka, M., Hammaren, M.M., Harjula, S.K., Halfpenny, N.J., Oksanen, K.E., Lahtinen, M.J.,  
500 Pajula, E.T., Iivanainen, A., Pesu, M., Ramet, M., 2012. *Mycobacterium marinum* Causes a  
501 Latent Infection that Can Be Reactivated by Gamma Irradiation in Adult Zebrafish. *PLoS*  
502 *Pathog* 8, e1002944.
- 503 Prouty, M.G., Correa, N.E., Barker, L.P., Jagadeeswaran, P., Klose, K.E., 2003. Zebrafish-  
504 *Mycobacterium marinum* model for mycobacterial pathogenesis. *FEMS Microbiol. Lett.* 225,  
505 177-182.
- 506 Ramakrishnan, L., 2012. Revisiting the role of the granuloma in tuberculosis. *Nat Rev*  
507 *Immunol* 12, 352-366.
- 508 Risalde, M.A., Lopez, V., Contreras, M., Mateos-Hernandez, L., Gortazar, C., de la Fuente, J.,  
509 2018. Control of mycobacteriosis in zebrafish (*Danio rerio*) mucosally vaccinated with heat-  
510 inactivated *Mycobacterium bovis*. *Vaccine* 36, 4447-4453.
- 511 Schindelin, J., Arganda-Carreras, I., Frise, E., Kaynig, V., Longair, M., Pietzsch, T., Preibisch, S.,  
512 Rueden, C., Saalfeld, S., Schmid, B., Tinevez, J.Y., White, D.J., Hartenstein, V., Eliceiri, K.,  
513 Tomancak, P., Cardona, A., 2012. Fiji: an open-source platform for biological-image analysis.  
514 *Nat Methods* 9, 676-682.
- 515 Schneider, C.A., Rasband, W.S., Eliceiri, K.W., 2012. NIH Image to ImageJ: 25 years of image  
516 analysis. *Nat Methods* 9, 671-675.
- 517 Sugimoto, K., Hui, S.P., Sheng, D.Z., Nakayama, M., Kikuchi, K., 2017. Zebrafish FOXP3 is  
518 required for the maintenance of immune tolerance. *Dev Comp Immunol* 73, 156-162.
- 519 Swaim, L.E., Connolly, L.E., Volkman, H.E., Humbert, O., Born, D.E., Ramakrishnan, L., 2006.  
520 *Mycobacterium marinum* infection of adult zebrafish causes caseating granulomatous  
521 tuberculosis and is moderated by adaptive immunity. *Infect Immun* 74, 6108-6117.
- 522 Takaki, K., Cosma, C.L., Troll, M.A., Ramakrishnan, L., 2012. An in vivo platform for rapid high-  
523 throughput antitubercular drug discovery. *Cell reports* 2, 175-184.

524 Takaki, K., Davis, J.M., Winglee, K., Ramakrishnan, L., 2013. Evaluation of the pathogenesis and  
525 treatment of *Mycobacterium marinum* infection in zebrafish. *Nat Protoc* 8, 1114-1124.  
526 Tenor, J.L., Oehlers, S.H., Yang, J.L., Tobin, D.M., Perfect, J.R., 2015. Live Imaging of Host-  
527 Parasite Interactions in a Zebrafish Infection Model Reveals Cryptococcal Determinants of  
528 Virulence and Central Nervous System Invasion. *mBio* 6.  
529 van der Sar, A.M., Abdallah, A.M., Sparrius, M., Reinders, E., Vandenbroucke-Grauls, C.M.,  
530 Bitter, W., 2004. *Mycobacterium marinum* strains can be divided into two distinct types based  
531 on genetic diversity and virulence. *Infect Immun* 72, 6306-6312.  
532 van Leeuwen, L.M., van der Kuip, M., Youssef, S.A., de Bruin, A., Bitter, W., van Furth, A.M., van  
533 der Sar, A.M., 2014. Modeling tuberculous meningitis in zebrafish using *Mycobacterium*  
534 *marinum*. *Dis Model Mech* 7, 1111-1122.  
535 Volkman, H.E., Clay, H., Beery, D., Chang, J.C., Sherman, D.R., Ramakrishnan, L., 2004.  
536 Tuberculous granuloma formation is enhanced by a mycobacterium virulence determinant.  
537 *PLoS Biol* 2, e367.  
538 Weerdenburg, E.M., Abdallah, A.M., Mitra, S., de Punder, K., van der Wel, N.N., Bird, S.,  
539 Appelmelk, B.J., Bitter, W., van der Sar, A.M., 2012. ESX-5-deficient *Mycobacterium marinum* is  
540 hypervirulent in adult zebrafish. *Cell Microbiol* 14, 728-739.  
541

542 Figure legends

543 Figure 1: Microscope station set up for intraperitoneal injection of *M. marinum* into adult zebrafish.

544 Injection station set up for a right-handed operator.

545

546 Figure 2: Defining and categorizing granuloma morphology.

547 (A) Use of two color overlay and the “Freehand selections” tool to trace the edges of a granuloma

548 and annotate as number regions of interest (ROIs)

549 (B) Use of DAPI channel to identify the presence of central necrosis highlighted in ROIs 1 and 2,

550 and directional organization of host nuclei at the rim of the granuloma highlighted in ROIs 1, 2, and

551 3 (previously annotated as #5 in (A)).

552

553 Figure 3: Extracellular matrix reorganization around zebrafish-*M. marinum* granulomas visualized

554 by picosirius red staining.

555 (A) Matched DAPI and *M. marinum*-tdTomato fluorescence image and picosirius red-stained

556 bright field image of a granuloma in the head kidney demonstrating collagen (red) deposition

557 through the cellular body of the necrotic granuloma.

558 (B) Matched DAPI and *M. marinum*-tdTomato fluorescence image and picosirius red-stained  
559 bright field image of a granuloma in the liver demonstrating highly organized collagen (red)  
560 containment of a necrotic granuloma.

561

562 Figure 4: Analysis of neutrophil recruitment to granulomas in the adult zebrafish-*M. marinum*  
563 infection model.

564 (A) Representative image of granuloma from a DAPI-stained section from a *Tg(lyzC:dsred)<sup>nz50</sup>*  
565 adult zebrafish infected with *M. marinum*-wasabi. White circle indicates edge of granuloma as  
566 defined by inspection of DAPI channel covered in Section 6.4.

567 (B) Quantification of granuloma bacterial content by fluorescent pixel count in individual  
568 granulomas.

569 (C) Quantification of total bacterial content per animal stratified by the absence or presence of  
570 necrosis in each lesion. P values from matched T-tests performed for each timepoint.

571 (D) Quantification of neutrophil recruitment to granulomas by fluorescent pixel count in individual  
572 granulomas.

573 (E) Ratio of neutrophil fluorescent pixels divided by bacterial fluorescent pixels in individual  
574 granuloma.

575 (F) Quantification of neutrophil recruitment to granulomas by fluorescent pixel count in individual  
576 granulomas stratified by stratified by the absence or presence of necrosis in each lesion.

577 (G) Ratio of neutrophil to bacterial fluorescent pixels in individual granulomas stratified by  
578 stratified by the absence or presence of necrosis in each lesion.

579 (H) Linear regression analysis of neutrophil and bacterial fluorescent pixels in individual  
580 granulomas.

581 P values from one way ANOVA with Tukey multiple comparison unless otherwise indicated.

582

583 Table 1: Zebrafish reporter lines and visualisation strategies

| Line                                                                                  | Cell type(s) marked                    | Visualisation strategy                | Reference               |
|---------------------------------------------------------------------------------------|----------------------------------------|---------------------------------------|-------------------------|
| Tg(cd41:GFP <sup>la2</sup> )                                                          | Thrombocytes                           | Native fluorescence or anti-GFP boost | (Lin et al., 2005)      |
| Tg(kdrl:GFP <sup>s843</sup> )                                                         | Endothelial cells                      | Native fluorescence                   | (Jin et al., 2005)      |
| Tg(lyzC:dsRed <sup>nz50</sup> or GFP <sup>nz117</sup> )                               | Neutrophils                            | Native fluorescence                   | (Hall et al., 2007)     |
| Tg(mfap4:iCre-2A-Tomato <sup>xt8</sup> , ubb:LOXP-TagBFP-LOXP-Tomato <sup>xt7</sup> ) | Macrophages                            | Native fluorescence                   | (Cronan et al., 2016)   |
| TgBAC(foxp3a:TagRFP <sup>vcc6</sup> )                                                 | T regulatory cells                     | Native fluorescence                   | (Hui et al., 2017)      |
| TgBAC(lck:EGFP <sup>vcc4</sup> )                                                      | T cells                                | Anti-GFP boost                        | (Sugimoto et al., 2017) |
| TgBAC(pdgfrb:gfp <sup>ncv22</sup> )                                                   | Fibroblasts and perivascular cells     | Native fluorescence or anti-GFP boost | (Ando et al., 2016)     |
| TgBAC(tnfa:GFP <sup>pd1028</sup> )                                                    | Tumor necrosis factor expressing cells | Native fluorescence                   | (Marjoram et al., 2015) |

584



Petri dish  
with  
wetted  
sponge

Injection  
needle  
and  
parafilm

Net for  
transfer of  
fish and  
spare  
beaker for  
recovery

0.75x tricaine

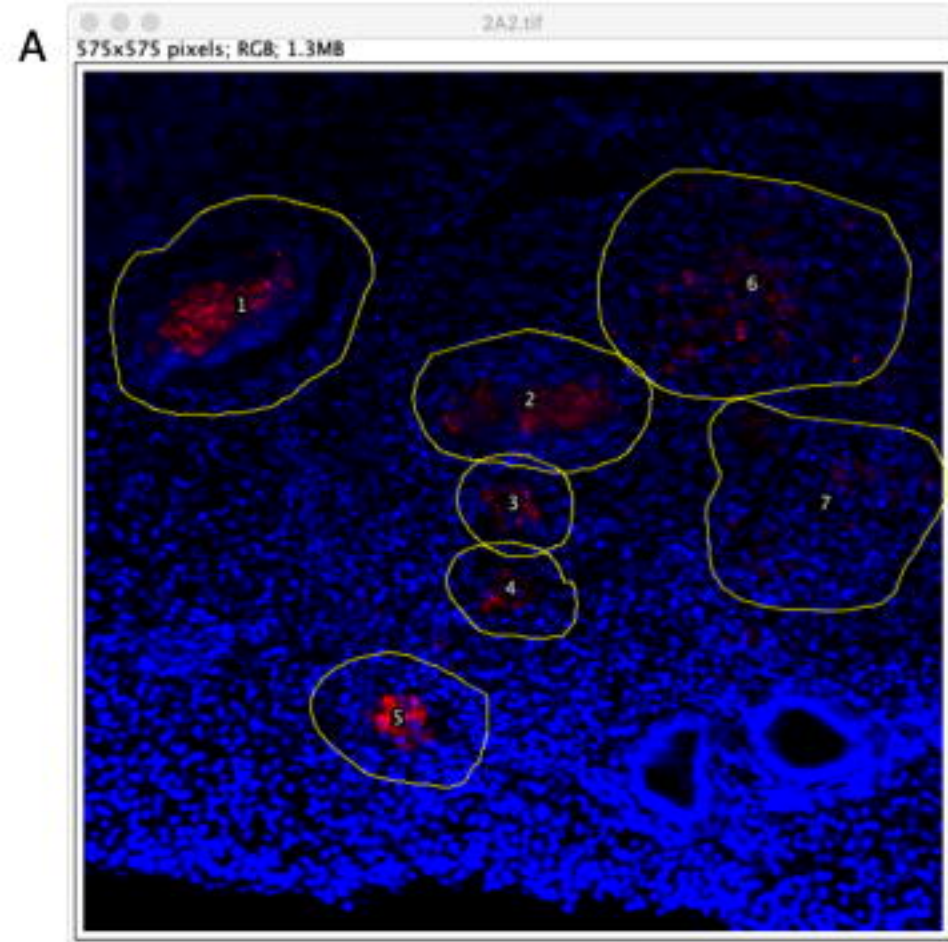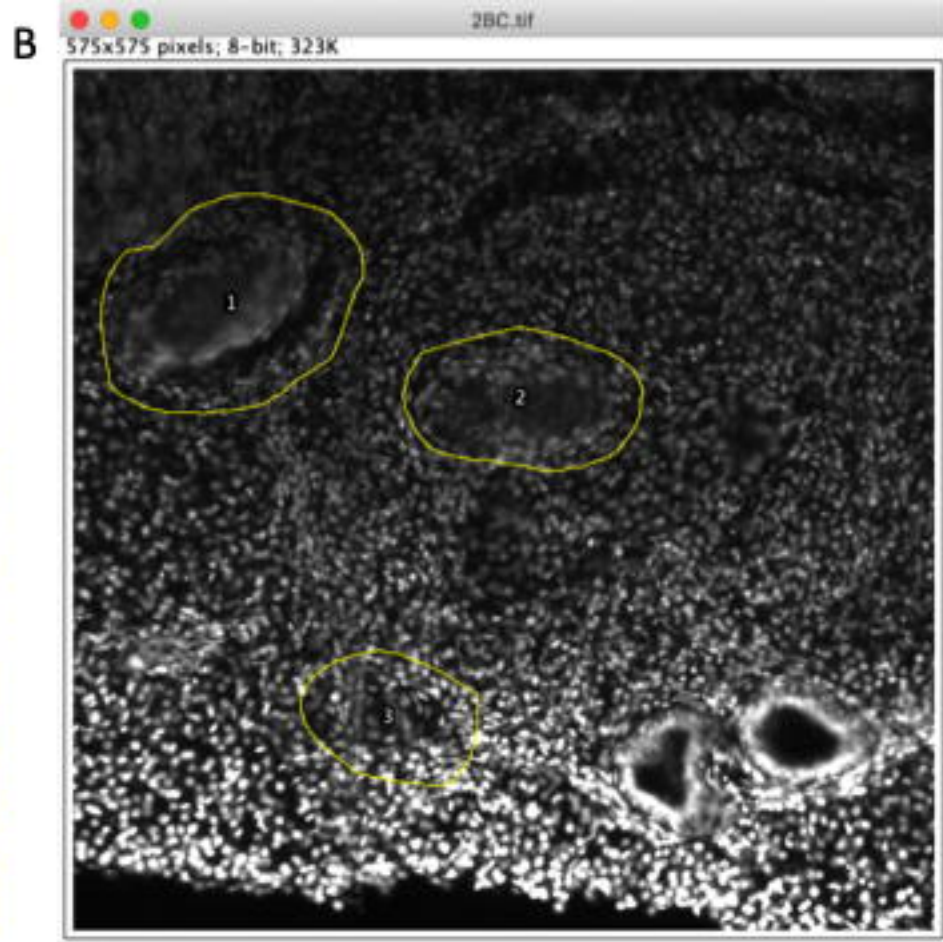



**A**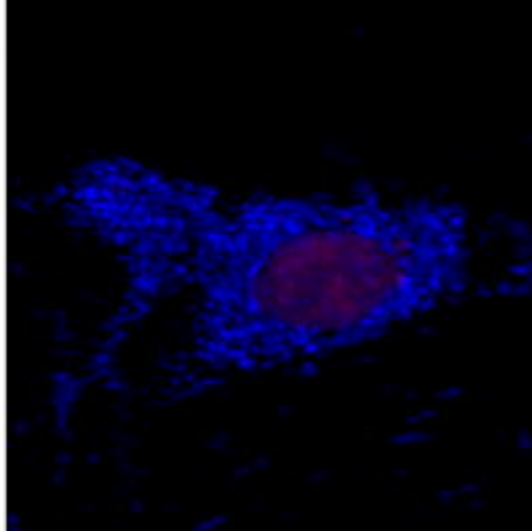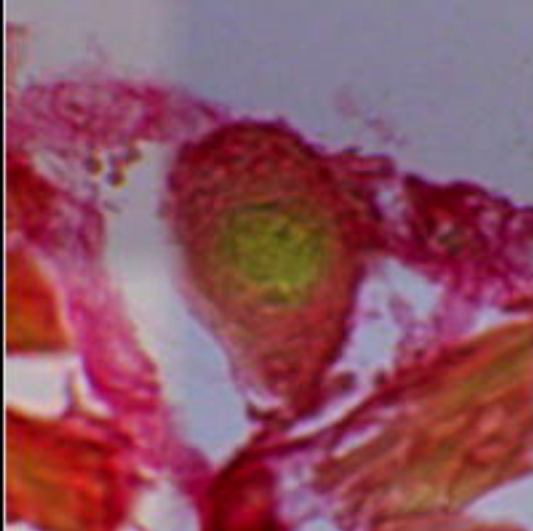**B**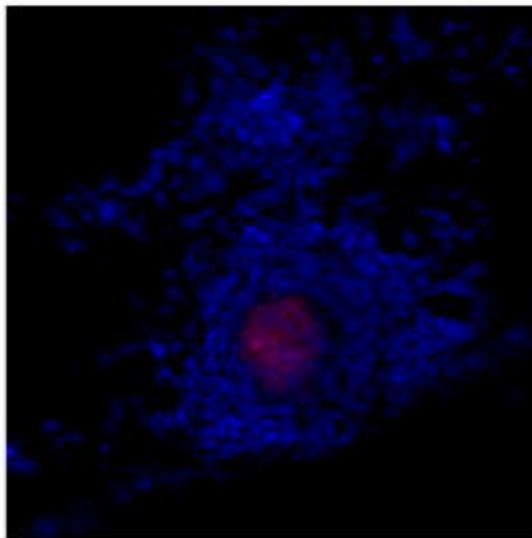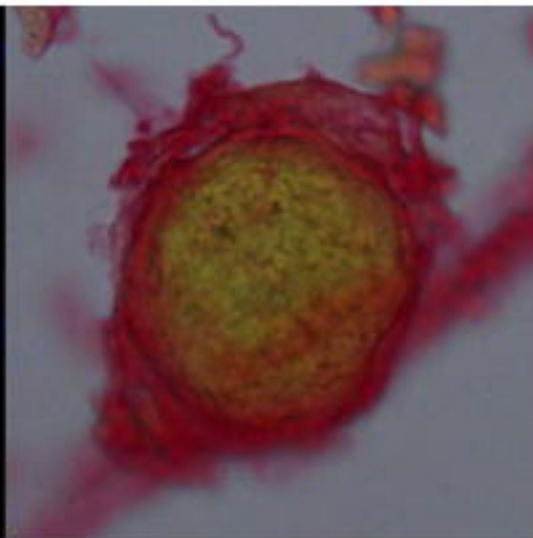

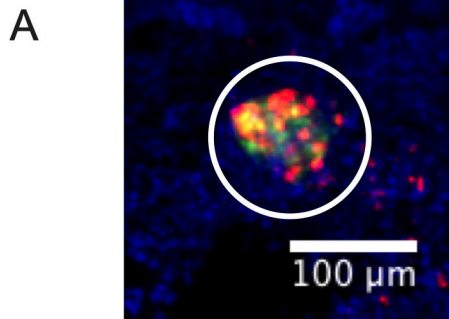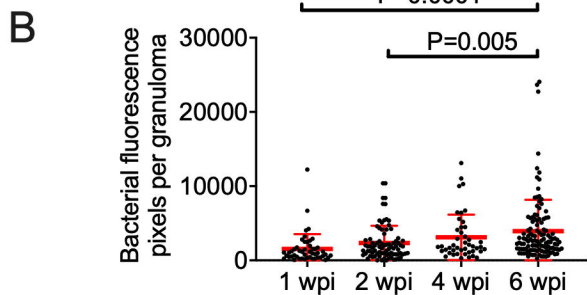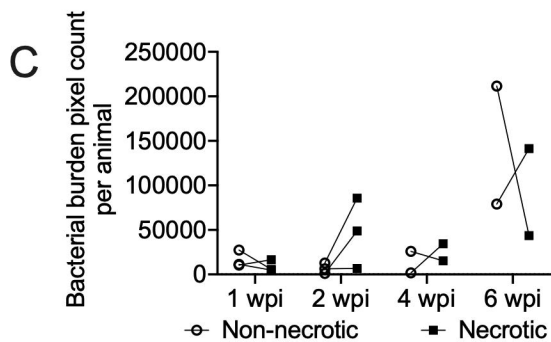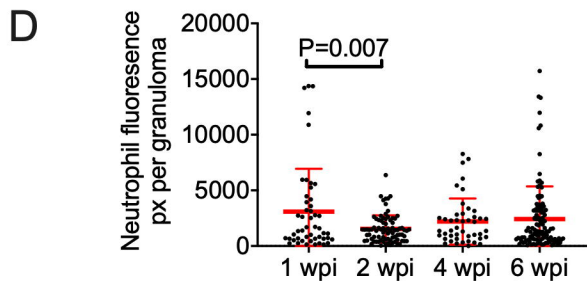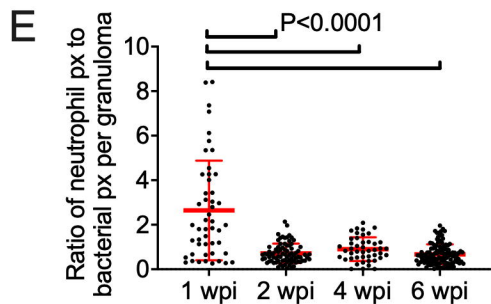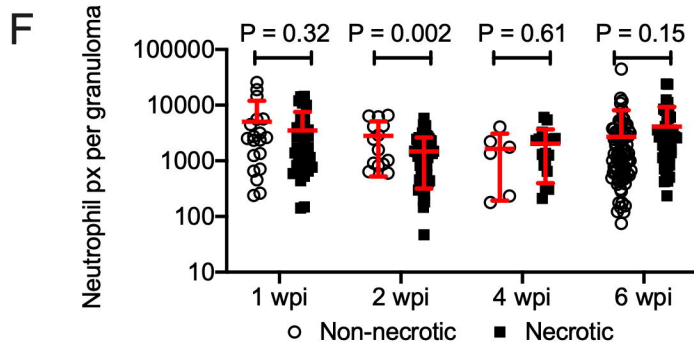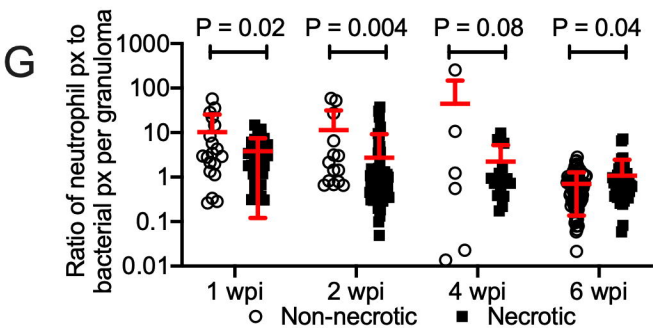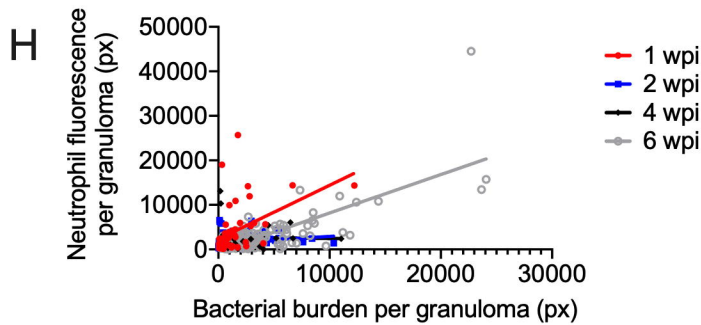

Source: https://www.biorxiv.org/content/10.1101/762740v1.full.pdf
